# Supplementary material for: Host Cell Amplification of Nutritional Stress Contributes To Persistence in Chlamydia trachomatis
Source: PubMed Central journal article supplement (PMC9765610; doi:10.1128/mbio.02719-22), 2022-11-15

| A | Step | Gene            | M (stability) |
|---|------|-----------------|---------------|
|   | 1    | <i>omcB</i>     | 0.17552546    |
|   | 2    | <i>16S rRNA</i> | 0.16175151    |
|   | 3    | <i>ompA</i>     | 0.10932164    |
|   | 4    | <i>nrdA</i>     | 0.0407112     |
|   | 5    | <i>nrdB</i>     | 0.03446746    |

**B** Gene stability measure

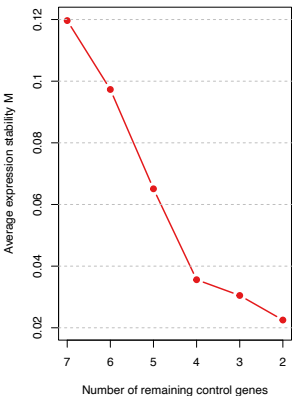

**C**

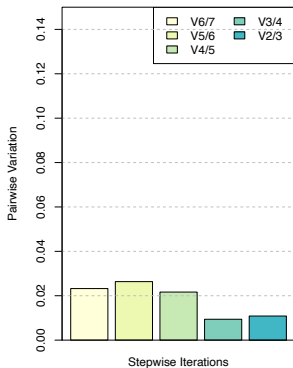

Supplement: mbio.02719-22-s0006.pdf [file mbio.02719-22-s0006.pdf]
