# Supplementary material for: Host Cell Amplification of Nutritional Stress Contributes To Persistence in Chlamydia trachomatis
Source: PubMed Central journal article supplement (PMC9765610; doi:10.1128/mbio.02719-22), 2022-11-15

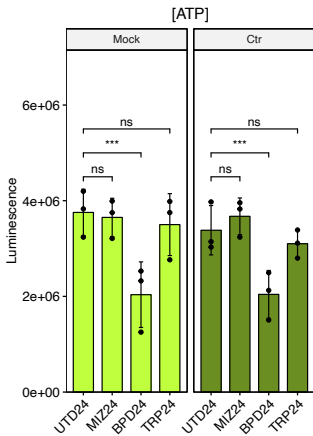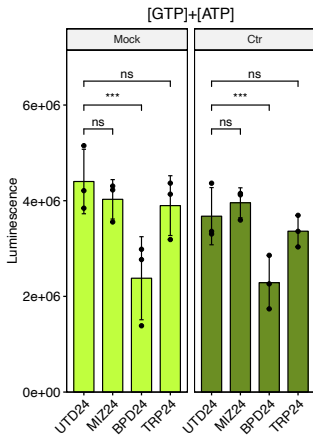

Supplement: mbio.02719-22-s0010.pdf [file mbio.02719-22-s0010.pdf]
